# Supplementary material for: Epigenetic regulation limits competence of pluripotent stem cell‐derived oocytes
Source: PubMed Central journal article supplement (PMC10690455; doi:10.15252/embj.2023113955), 2023-10-18
Supplement: EMBJ-42-e113955-s004.pdf [file EMBJ-42-e113955-s004.pdf]

# Appendix

## Epigenetic regulation limits competence of pluripotent stem cell-derived oocytes

Eishi Aizawa, Evgeniy A. Ozonov, Yumiko K. Kawamura, Charles-Etienne Dumeau, So  
Nagaoka, Tomoya S. Kitajima, Mitinori Saitou, Antoine H. F. M. Peters\*, Anton Wutz\*

\*Correspondence: antoine.peters@fmi.ch (A.H.F.M.P.), awutz@ethz.ch (A.W.)

### Table of Contents:

|                          |        |
|--------------------------|--------|
| Appendix Figure S1 ..... | Page 2 |
|--------------------------|--------|

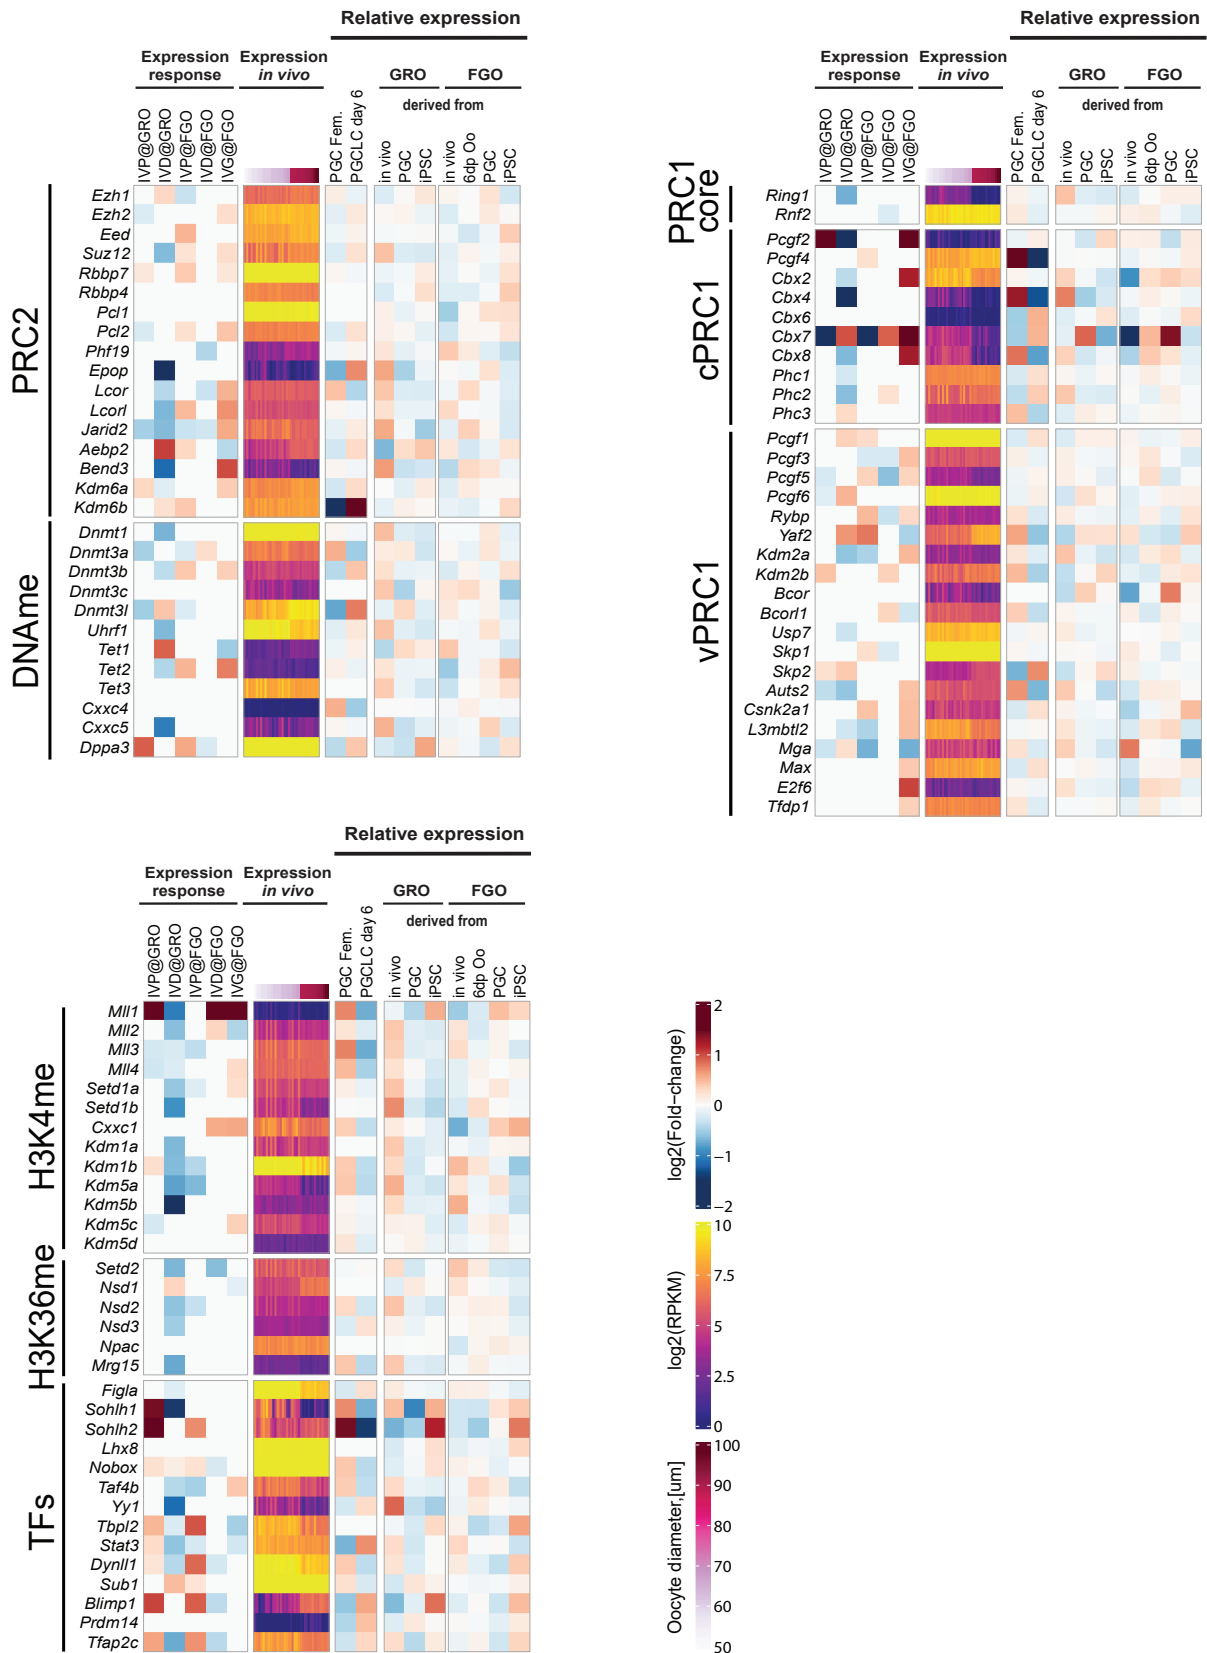

## Appendix Figure S1. Expression of genes involved in epigenetic regulation and transcriptional reprogramming

Expression responses to each stage of *in vitro* development of genes involved in epigenetic regulation and transcriptional reprogramming (heatmap *Expression response*, all  $|\log_2(\text{Fold-change})|$  with  $FDR \geq 5\%$  are considered non-significant and set to 0). In addition, expression in *in vivo* oocytes (heatmap *Expression in vivo*), and relative expression in PGC and PGCLC, GRO and FGO are displayed (group of heatmaps *Relative expression*, data for biological replicates or single oocytes belonging to particular cohorts were merged). Relative expression for each gene was calculated as difference between expression level ( $\log_2(\text{RPKM})$ ) and average expression calculated separately for PGC and PGCLC, GRO, and FGO.
